# Supplementary material
Source: PubMed Central journal article supplement (PMC6481670)
Supplement: NIHMS1521221-supplement-Table_S4.pdf [file NIHMS1521221-supplement-Table_S4.pdf]

**Table S4**

|                                 | <b>Forward (5' -&gt; 3')</b> | <b>Reverse (5' -&gt; 3')</b> |
|---------------------------------|------------------------------|------------------------------|
| <b>actin</b>                    | AGCTCATTGTAGAAGGTGTGG        | GTGGGAATGGGTCAGAAGG          |
| <b>18S</b>                      | GGTACAGTGAAACTGCGAAT         | CAGTTATCCAAGTAGGAGAG         |
| <b>TNF-<math>\alpha</math></b>  | ACGGCATGGATCTCAAAGAC         | GTGGGTGAGGAGCACGTAGT         |
| <b>IFN-<math>\gamma</math></b>  | TCAAGTGGCATAGATGTGGAAG       | CGCTTATGTTGTTGCTGATGG        |
| <b>IFN-<math>\beta</math></b>   | ATGGCTAGGCYCTGTGCTTTC        | TCTGAYCACCTCCCAGGCACA        |
| <b>ISG15</b>                    | GGGGGAGAGTCGATCCAG           | CCCCAGCATCTTCACCTT           |
| <b>Chnrb4</b>                   | GTAGCTACCGCCCAAACCTC         | GTGTAAAGGCAGAAAGCAGGA        |
| <b>IFN<math>\gamma</math>R1</b> | GTCCTTGCTCTCTGTGGTAAA        | AGATCACCGTCTCACTCTCT         |
| <b>LCMV<br/>NP</b>              | CAGAAATGTTGATGCTGGACTG<br>C  | CAGACCTTGGCTTGCTTTACACA<br>G |
